# Supplementary material for: Differential Effects of Three Nutritional Supplements on the Nutrient Intake of Pregnant Women Enrolled in a Conditional Cash Transfer Program in Mexico: A Cluster Randomized Trial
Source: MDPI journal article supplement (doi:10.3390/nu14153003), 2022-07-22
Supplement: s1 [file s1]

Table S1. Median change<sup>†</sup> of nutrient intake from diet alone, by evaluation study groups <sup>‡</sup> and period <sup>¶</sup>

|                                      | Beverage         | Tablets         | MNP             | Tablets<br>Beverage | vs MNP vs<br>Beverage | MNP vs<br>Tablets |
|--------------------------------------|------------------|-----------------|-----------------|---------------------|-----------------------|-------------------|
| <b>Changes from baseline to 37wk</b> |                  |                 |                 |                     |                       |                   |
|                                      | n=152            | n=168           | n=157           |                     |                       |                   |
| Energy, kcal                         | -194.4* ± 77.3   | 11.8 ± 61.4     | 31.8 ± 83.8     | 206.2* ± 97.9       | 226.2 ± 121.3         | 20.1 ± 102.9      |
| Carbohydrates, g                     | -18.2 ± 10.5     | -1.5 ± 10.6     | -14.3 ± 9.0     | 16.7 ± 15.0         | 3.8 ± 14.8            | -12.9 ± 14.5      |
| Protein, g                           | -4.83* ± 2.20    | -0.05 ± 2.09    | 0.17 ± 2.31     | 4.78 ± 2.70         | 4.99 ± 3.20           | 0.21 ± 3.12       |
| Lipids, g                            | -10.02*** ± 2.75 | 0.12 ± 3.42     | 1.86 ± 4.22     | 10.13* ± 4.79       | 11.88* ± 5.53         | 1.74 ± 5.20       |
| Iron, mg                             | -1.21** ± 0.44   | -0.38 ± 0.38    | -0.51 ± 0.53    | 0.83 ± 0.56         | 0.70 ± 0.75           | -0.13 ± 0.65      |
| Zinc, mg                             | -0.80* ± 0.37    | 0.09 ± 0.29     | 0.03 ± 0.32     | 0.90 ± 0.48         | 0.83 ± 0.49           | -0.07 ± 0.44      |
| Vitamin C, mg                        | -15.2 ± 12.9     | -5.7 ± 8.2      | -12.0 ± 10.3    | 9.6 ± 16.3          | 3.3 ± 15.2            | -6.3 ± 11.6       |
| Vitamin E, mg                        | -0.21 ± 0.61     | -0.01 ± 0.54    | -0.10 ± 0.62    | 0.21 ± 0.87         | 0.11 ± 0.88           | -0.09 ± 0.84      |
| Vitamin B12, mcg                     | -0.19 ± 0.16     | 0.09 ± 0.21     | 0.46* ± 0.19    | 0.28 ± 0.29         | 0.65* ± 0.25          | 0.37 ± 0.29       |
| DFE, mcg <sup>§</sup>                | -45.1* ± 21.4    | -8.2 ± 23.0     | -9.4 ± 17.5     | 36.9 ± 32.0         | 35.7 ± 29.5           | -1.3 ± 31.5       |
| <b>Changes from baseline to 1mpp</b> |                  |                 |                 |                     |                       |                   |
|                                      | n=188            | n=197           | n=178           |                     |                       |                   |
| Energy, kcal                         | -272.8*** ± 51.5 | -17.5 ± 58.1    | -91.9 ± 66.4    | 255.3*** ± 75.4     | 180.9* ± 88.8         | -74.4 ± 94.5      |
| Carbohydrates, g                     | -36.6*** ± 8.5   | -12.7 ± 8.1     | -23.1** ± 7.8   | 23.9* ± 12.1        | 13.5 ± 12.2           | -10.4 ± 11.7      |
| Protein, g                           | -2.95 ± 1.58     | 3.31 ± 2.32     | 2.56 ± 2.38     | 6.27* ± 2.51        | 5.51 ± 2.89           | -0.76 ± 3.37      |
| Lipids, g                            | -11.95*** ± 2.93 | -2.21 ± 2.73    | -5.26 ± 3.21    | 9.74* ± 4.35        | 6.69 ± 4.06           | -3.05 ± 4.42      |
| Iron, mg                             | -1.48*** ± 0.29  | -0.40 ± 0.26    | -0.60 ± 0.31    | 1.08** ± 0.38       | 0.88* ± 0.42          | -0.20 ± 0.43      |
| Zinc, mg                             | -0.75** ± 0.26   | 0.03 ± 0.27     | 0.29 ± 0.33     | 0.78* ± 0.37        | 1.04* ± 0.43          | 0.26 ± 0.45       |
| Vitamin C, mg                        | -80.4*** ± 12.1  | -77.0*** ± 11.8 | -72.9*** ± 12.9 | 3.3 ± 18.7          | 7.5 ± 19.5            | 4.2 ± 14.0        |
| Vitamin E, mg                        | -3.54*** ± 0.65  | -1.15* ± 0.47   | -2.42** ± 0.77  | 2.39** ± 0.79       | 1.12 ± 0.90           | -1.27 ± 0.87      |
| Vitamin B12, mcg                     | -0.41* ± 0.16    | 0.14 ± 0.16     | 0.00 ± 0.23     | 0.54* ± 0.23        | 0.41 ± 0.25           | -0.14 ± 0.30      |
| DFE, mcg <sup>§</sup>                | -105.0*** ± 17.5 | -58.3*** ± 16.5 | -79.3** ± 25.7  | 46.7* ± 23.0        | 25.8 ± 32.3           | -21.0 ± 29.4      |
| <b>Changes from baseline to 3mpp</b> |                  |                 |                 |                     |                       |                   |
|                                      | n=187            | n=198           | n=169           |                     |                       |                   |
| Energy, kcal                         | -195.7*** ± 57.3 | -52.4 ± 58.5    | -132.7 ± 78.2   | 143.3 ± 90.6        | 62.9 ± 98.7           | -80.4 ± 92.2      |
| Carbohydrates, g                     | -43.0*** ± 11.4  | -22.1* ± 9.7    | -23.9* ± 11.7   | 20.9 ± 13.0         | 19.1 ± 17.6           | -1.8 ± 14.4       |

|                  |                 |                |                 |              |             |              |
|------------------|-----------------|----------------|-----------------|--------------|-------------|--------------|
| Protein, g       | -5.10* ± 2.38   | -4.11 ± 2.49   | 1.19 ± 3.12     | 0.99 ± 3.57  | 6.29 ± 4.20 | 5.31 ± 3.90  |
| Lipids, g        | -7.31* ± 3.44   | 1.96 ± 3.36    | 1.43 ± 4.60     | 9.27 ± 5.08  | 8.74 ± 6.11 | -0.53 ± 5.95 |
| Iron, mg         | -1.52* ± 0.73   | -0.74 ± 0.69   | -0.38 ± 0.79    | 0.78 ± 0.76  | 1.14 ± 0.90 | 0.36 ± 0.64  |
| Zinc, mg         | -0.85* ± 0.34   | -0.44 ± 0.36   | -0.13 ± 0.39    | 0.41 ± 0.54  | 0.73 ± 0.51 | 0.32 ± 0.52  |
| Vitamin C, mg    | -74.1*** ± 7.6  | -50.2*** ± 8.6 | -53.4*** ± 12.3 | 24.0 ± 12.6  | 20.7 ± 14.9 | -3.2 ± 14.5  |
| Vitamin E, mg    | -2.05** ± 0.78  | -0.28 ± 0.55   | -0.92 ± 0.93    | 1.77* ± 0.90 | 1.12 ± 1.28 | -0.65 ± 1.20 |
| Vitamin B12, mcg | -0.27 ± 0.23    | -0.15 ± 0.18   | 0.10 ± 0.26     | 0.12 ± 0.31  | 0.37 ± 0.35 | 0.25 ± 0.33  |
| DFE, mcg §       | -97.0*** ± 26.3 | -32.4 ± 19.6   | -30.3 ± 23.9    | 64.6 ± 34.8  | 66.7 ± 37.2 | 2.1 ± 32.0   |

† Estimates are median changes or differences of median changes between study groups ± standard error

\*p<0.05,\*\*p<0.01,\*\*\*p<0.001

‡ Beverage: Fortified beverage, Tablets: Micronutrient tablets and MNP: Micronutrient powder

Φ 25wp: 25 weeks of pregnant (baseline), 37wp: 37 weeks of pregnant, 1mpp: 1 month post-partum, 3 mpp: 3 months post-partum

§ DFE=Dietary folate equivalents (bioavailability= folic acid x 1.7)

Table S2. Median change<sup>†</sup> of nutrient intake from diet plus supplements, by evaluation study groups <sup>‡</sup> and period <sup>Φ</sup>

|                                      | Beverage        | Tablets         | MNP             | Tablets vs Beverage | MNP vs Beverage | MNP vs Tablets |
|--------------------------------------|-----------------|-----------------|-----------------|---------------------|-----------------|----------------|
| <b>Changes from baseline to 37wk</b> |                 |                 |                 |                     |                 |                |
|                                      | n=152           | n=168           | n=157           |                     |                 |                |
| Energy, kcal                         | 36.0 ± 83.8     | 13.6 ± 68.0     | 33.7 ± 85.1     | -22.4 ± 108.9       | -2.4 ± 124.6    | 20.1 ± 108.1   |
| Carbohydrates, g                     | 5.4 ± 10.5      | -3.2 ± 11.3     | -16.2 ± 10.1    | -8.6 ± 15.7         | -21.6 ± 15.2    | -13.0 ± 16.0   |
| Protein, g                           | 5.49** ± 2.12   | 0.63 ± 1.96     | -0.27 ± 2.44    | -4.86 ± 2.67        | -5.77 ± 3.29    | -0.90 ± 3.18   |
| Lipids, g                            | 0.76 ± 2.96     | -0.13 ± 3.47    | 1.61 ± 4.31     | -0.90 ± 5.03        | 0.85 ± 5.76     | 1.74 ± 5.29    |
| Iron, mg                             | 11.62*** ± 0.78 | 14.08*** ± 0.55 | 13.35*** ± 0.59 | 2.46* ± 0.97        | 1.73 ± 1.07     | -0.73 ± 0.88   |
| Zinc, mg                             | 12.58*** ± 0.74 | 14.49*** ± 0.41 | 13.97*** ± 0.48 | 1.91* ± 0.89        | 1.39 ± 0.83     | -0.53 ± 0.67   |
| Vitamin C, mg                        | 69.4*** ± 14.5  | 79.2*** ± 9.8   | 83.8*** ± 10.8  | 9.8 ± 18.1          | 14.3 ± 16.1     | 4.5 ± 14.0     |
| Vitamin E, mg                        | 8.67*** ± 0.80  | 9.32*** ± 0.70  | 8.87*** ± 0.72  | 0.64 ± 1.14         | 0.19 ± 1.14     | -0.45 ± 1.01   |
| Vitamin B12, mcg                     | 2.13*** ± 0.19  | 2.41*** ± 0.20  | 2.84*** ± 0.22  | 0.28 ± 0.30         | 0.70* ± 0.30    | 0.43 ± 0.32    |
| DFE, mcg <sup>§</sup>                | 542.8*** ± 34.0 | 640.0*** ± 35.5 | 618.0*** ± 19.3 | 97.2 ± 54.4         | 75.3 ± 40.2     | -21.9 ± 44.8   |
| <b>Changes from baseline to 1mpp</b> |                 |                 |                 |                     |                 |                |
|                                      | n=188           | n=197           | n=178           |                     |                 |                |
| Energy, kcal                         | -51.5 ± 46.9    | -23.0 ± 59.3    | -97.4 ± 64.3    | 28.5 ± 75.8         | -45.9 ± 83.2    | -74.4 ± 94.1   |
| Carbohydrates, g                     | -16.0 ± 8.7     | -9.1 ± 9.8      | -20.7** ± 7.2   | 6.9 ± 13.5          | -4.8 ± 11.9     | -11.6 ± 12.3   |
| Protein, g                           | 7.15*** ± 1.51  | 3.90 ± 2.26     | 2.10 ± 2.64     | -3.24 ± 2.68        | -5.05 ± 3.30    | -1.81 ± 3.59   |
| Lipids, g                            | -3.55 ± 2.85    | -2.22 ± 3.14    | -6.13 ± 3.82    | 1.32 ± 4.59         | -2.59 ± 4.44    | -3.91 ± 5.17   |
| Iron, mg                             | 12.23*** ± 0.46 | 13.02*** ± 0.53 | 13.18*** ± 0.47 | 0.78 ± 0.69         | 0.95 ± 0.68     | 0.16 ± 0.79    |
| Zinc, mg                             | 12.93*** ± 0.43 | 13.62*** ± 0.55 | 14.46*** ± 0.49 | 0.68 ± 0.63         | 1.52* ± 0.66    | 0.84 ± 0.79    |
| Vitamin C, mg                        | 10.3 ± 12.7     | 13.6 ± 11.9     | 14.9 ± 14.5     | 3.3 ± 19.8          | 4.6 ± 22.2      | 1.3 ± 15.2     |
| Vitamin E, mg                        | 5.29*** ± 0.62  | 7.31*** ± 0.58  | 5.93*** ± 0.64  | 2.02* ± 0.93        | 0.64 ± 0.87     | -1.38 ± 0.91   |
| Vitamin B12, mcg                     | 1.83*** ± 0.21  | 2.36*** ± 0.19  | 2.49*** ± 0.22  | 0.53 ± 0.29         | 0.66* ± 0.28    | 0.13 ± 0.32    |
| DFE, mcg <sup>§</sup>                | 500.9*** ± 24.6 | 558.1*** ± 20.7 | 528.7*** ± 23.7 | 57.2 ± 34.9         | 27.8 ± 34.2     | -29.3 ± 36.0   |
| <b>Changes from baseline to 3mpp</b> |                 |                 |                 |                     |                 |                |
|                                      | n=187           | n=198           | n=169           |                     |                 |                |
| Energy, kcal                         | -52.2 ± 58.6    | -45.5 ± 69.5    | -82.3 ± 86.8    | 6.8 ± 100.4         | -30.0 ± 115.3   | -36.8 ± 109.1  |
| Carbohydrates, g                     | -23.8* ± 11.8   | -21.9* ± 10.3   | -23.7* ± 11.7   | 1.9 ± 14.3          | 0.1 ± 18.5      | -1.8 ± 15.4    |
| Protein, g                           | 3.95 ± 2.29     | -3.57 ± 2.75    | 1.08 ± 3.47     | -7.52* ± 3.78       | -2.87 ± 4.42    | 4.65 ± 4.36    |
| Lipids, g                            | 0.81 ± 4.02     | 2.20 ± 3.75     | 0.84 ± 4.26     | 1.39 ± 5.56         | 0.03 ± 6.14     | -1.36 ± 5.90   |

|                  |                 |                 |                 |              |              |              |
|------------------|-----------------|-----------------|-----------------|--------------|--------------|--------------|
| Iron, mg         | 10.54*** ± 0.57 | 12.44*** ± 0.73 | 13.01*** ± 0.72 | 1.89 ± 1.02  | 2.47* ± 1.03 | 0.57 ± 0.97  |
| Zinc, mg         | 11.30*** ± 0.62 | 12.69*** ± 0.55 | 13.45*** ± 0.68 | 1.39 ± 0.87  | 2.15* ± 0.89 | 0.76 ± 0.85  |
| Vitamin C, mg    | 5.0 ± 10.1      | 29.1*** ± 8.6   | 30.1** ± 9.9    | 24.1 ± 14.8  | 25.1 ± 15.1  | 0.9 ± 12.8   |
| Vitamin E, mg    | 6.12*** ± 0.95  | 8.34*** ± 0.55  | 7.73*** ± 0.99  | 2.23* ± 1.11 | 1.61 ± 1.42  | -0.62 ± 1.20 |
| Vitamin B12, mcg | 1.75*** ± 0.27  | 2.02*** ± 0.30  | 2.17*** ± 0.32  | 0.27 ± 0.43  | 0.42 ± 0.45  | 0.15 ± 0.44  |
| DFE, mcg §       | 461.3*** ± 30.4 | 524.6*** ± 36.6 | 556.0*** ± 44.6 | 63.4 ± 52.7  | 94.7 ± 56.5  | 31.4 ± 57.3  |

† Estimates are median changes or differences of median changes between study groups ± standard error

\*p<0.05, \*\*p<0.01, \*\*\*p<0.001

‡ Beverage: Fortified beverage, Tablets: Micronutrient tablets and MNP: Micronutrient powder

Φ 25wp: 25 weeks of pregnant (baseline), 37wp: 37 weeks of pregnant, 1mpp: 1 month post-partum, 3 mpp: 3 months post-partum

§ DFE=Dietary folate equivalents (bioavailability= folic acid x 1.7)

Table S3. Covariate-adjusted median† energy intake of food groups from diet alone, by evaluation study groups ‡ and period ¶

|                            |      | Beverage |             | Tablets     |                   | MNP    |             |
|----------------------------|------|----------|-------------|-------------|-------------------|--------|-------------|
|                            |      | Median   | (95% CI)    | Median      | (95% CI)          | Median | (95% CI)    |
| Dairy                      | 37wk | 158a     | (128, 188)  | 192         | (157, 227)        | 210    | (172, 249)  |
|                            | 1mpp | 196      | (168, 224)  | 211         | (184, 239)        | 242    | (212, 271)  |
|                            | 3mpp | 167      | (141, 192)  | 172         | (143, 202)        | 198    | (166, 229)  |
| Fast Food                  | 37wk | 145      | (112, 177)  | 157         | (136, 178)        | 133    | (97, 168)   |
|                            | 1mpp | 115      | (89, 141)   | 132         | (109, 155)        | 125    | (97, 152)   |
|                            | 3mpp | 164      | (144, 184)  | 187         | (161, 213)        | 162    | (136, 187)  |
| Leguminous                 | 37wk | 26       | (19, 34)    | 20          | (16, 24)          | 20     | (15, 24)    |
|                            | 1mpp | 23       | (17, 29)    | 22          | (16, 28)          | 19     | (14, 24)    |
|                            | 3mpp | 25       | (19, 30)    | 22          | (16, 29)          | 25     | (19, 31)    |
| Drinks                     | 37wk | 176      | (136, 216)  | 188         | (159, 217)        | 204    | (172, 235)  |
|                            | 1mpp | 128      | (99, 157)   | 149         | (120, 178)        | 149    | (124, 174)  |
|                            | 3mpp | 176      | (152, 200)  | 163         | (135, 191)        | 173    | (153, 192)  |
| Snack, Candies and Dessert | 37wk | 86       | (61, 110)   | 91          | (65, 117)         | 99     | (86, 111)   |
|                            | 1mpp | 57       | (49, 66)    | 61          | (50, 73)          | 55     | (48, 63)    |
|                            | 3mpp | 84       | (64, 104)   | 78          | (60, 96)          | 92     | (73, 111)   |
| Soups, cream and paste     | 37wk | 30       | (25, 35)    | 31          | (27, 35)          | 29     | (25, 33)    |
|                            | 1mpp | 42       | (36, 48)    | 47          | (42, 52)          | 40     | (35, 46)    |
|                            | 3mpp | 34       | (26, 42)    | 32          | (25, 38)          | 34     | (28, 40)    |
| Fruits and vegetables      | 37wk | 261      | (221, 300)  | 279         | (236, 323)        | 262    | (231, 293)  |
|                            | 1mpp | 123      | (98, 147)   | 158         | (135, 181)        | 172    | (121, 223)  |
|                            | 3mpp | 150      | (137, 163)  | <b>201b</b> | <b>(180, 223)</b> | 159    | (137, 182)  |
| Meat,sausage and egg       | 37wk | 162      | (145, 179)  | 156         | (136, 175)        | 155    | (138, 172)  |
|                            | 1mpp | 184      | (162, 205)  | 207         | (177, 236)        | 182    | (158, 207)  |
|                            | 3mpp | 185      | (167, 203)  | 189         | (167, 210)        | 180    | (163, 198)  |
|                            | 37wk | 1008     | (877, 1140) | 973         | (833, 1113)       | 937    | (810, 1064) |

|           |     |      |      |             |      |             |      |             |
|-----------|-----|------|------|-------------|------|-------------|------|-------------|
| Cereals   | and | 1mpp | 1109 | (995, 1222) | 1105 | (986, 1224) | 1096 | (998, 1194) |
| root crop |     | 3mpp | 1056 | (910, 1201) | 1001 | (812, 1190) | 1023 | (896, 1151) |

† Estimates are covariate-adjusted medians from a quantile regression that included school level, BMI, a wealth index and total energy at baseline as adjustment covariates. Standard errors were adjusted for data dependencies within communities.

‡ Beverage: Fortified beverage, Tablets: Micronutrient tablets and MNP: Micronutrient powder

Φ 37wp: 37 weeks of pregnant, 1mpp: 1 month post-partum, 3 mpp: 3 months post-partum

a p=0.042 MNP vs Beverage

b p=0.001 Tablets vs Beverage, p=0.010 Tablets vs MNP
